# Supplementary material
Source: publisher figshare collection journal article supplement (https://acs.figshare.com/ndownloader/files/3751072)
Supplement: Supplementary file 1 [file 3751072]

# Rate dependent performance related to crystal structure evolution of $\text{Na}_{0.67}\text{Mn}_{0.8}\text{Mg}_{0.2}\text{O}_2$ in a sodium-ion battery.

Neeraj Sharma<sup>1,\*</sup>, Nuria Tapia-Ruiz<sup>2</sup>, Gurpreet Singh<sup>3</sup>, A. Robert Armstrong<sup>4</sup>, James C. Pramudita<sup>1</sup>, Helen E. A. Brand<sup>5</sup>, Juliette Billaud<sup>4</sup>, Peter G. Bruce<sup>2</sup>, Teofilo Rojo<sup>3,6,\*</sup>

## Supporting Information

Loading variability - 1.13, 3.17 and 1.10 mg active material loadings were used for the discharging rates of 100, 200 and 400 mAh/g in Figure S1 and S2 below, showing an apparent electrochemical enhancement at the 200 mAh/g discharge rate.

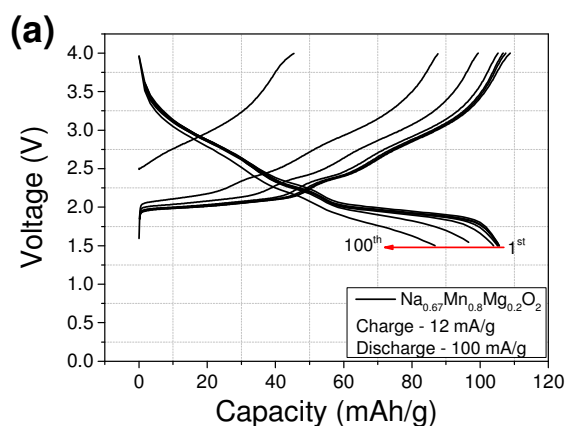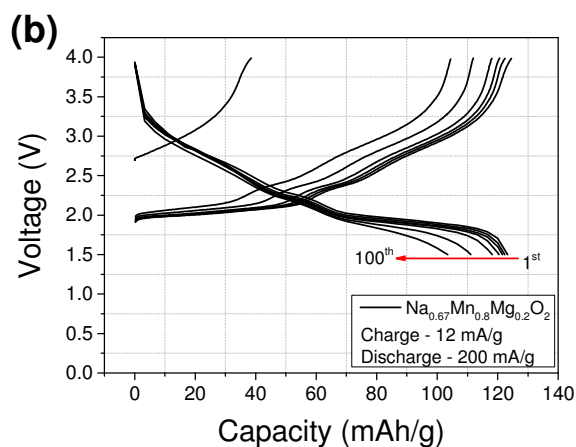

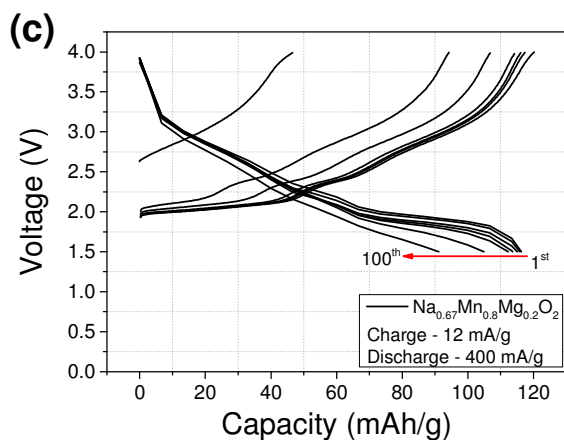

**Figure S1.** The potential profiles of the  $\text{Na}_{0.67}\text{Mn}_{0.8}\text{Mg}_{0.2}\text{O}_2$  electrode charged at 12 mA/g and discharged at (a) 100, (b) 200 and (c) 400 mA/g. Profiles for the 1<sup>st</sup>, 2<sup>nd</sup>, 5<sup>th</sup>, 10<sup>th</sup>, 20<sup>th</sup>, 50<sup>th</sup> and 100<sup>th</sup> cycles are shown.

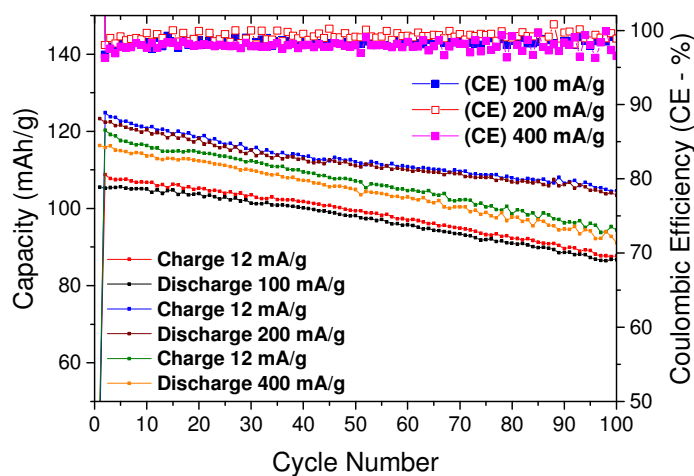

**Figure S2.** The capacity retention and Coulombic efficiency at 12 mA/g charge and 100, 200, 400 mA/g discharge rates.

To test for differences between the central Kapton-tape covered part of the *in situ* cell and the outer part, the *in situ* cells were cycled offline, electrodes extracted and analysed using a laboratory XRD with controllable incoming X-ray beam slit sizes. It is also worthwhile to note that the Kapton-tape covered hole in the *in situ* cells is 3 mm in diameter and the X-ray beam dimensions used at the Australian Synchrotron Powder Diffraction beamline was 1.3 x 2 mm.

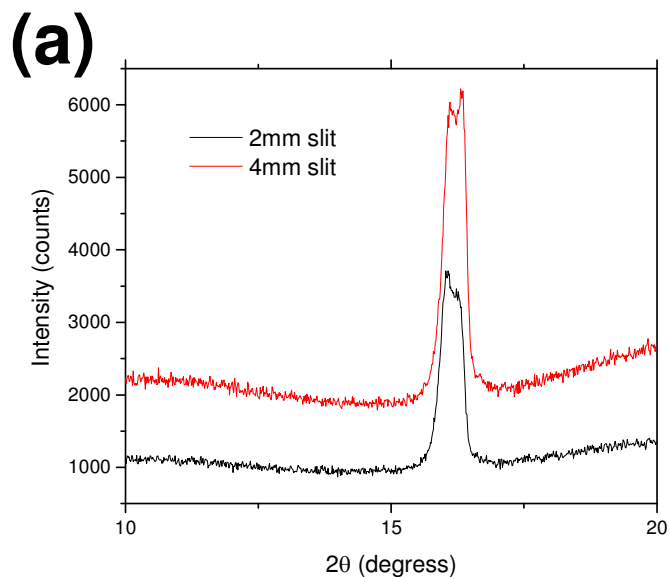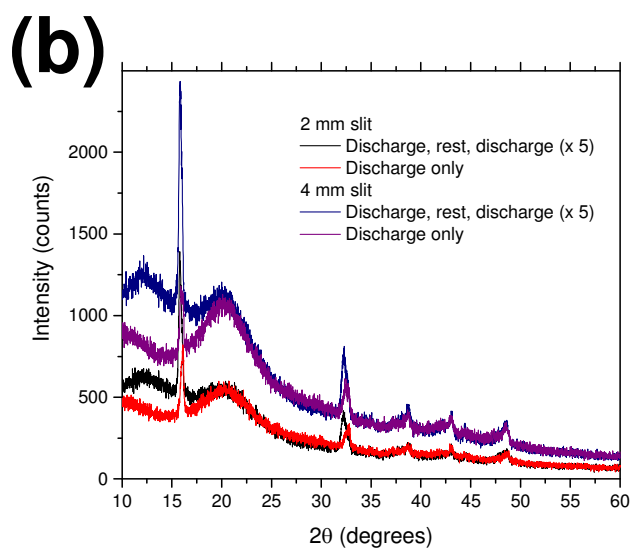

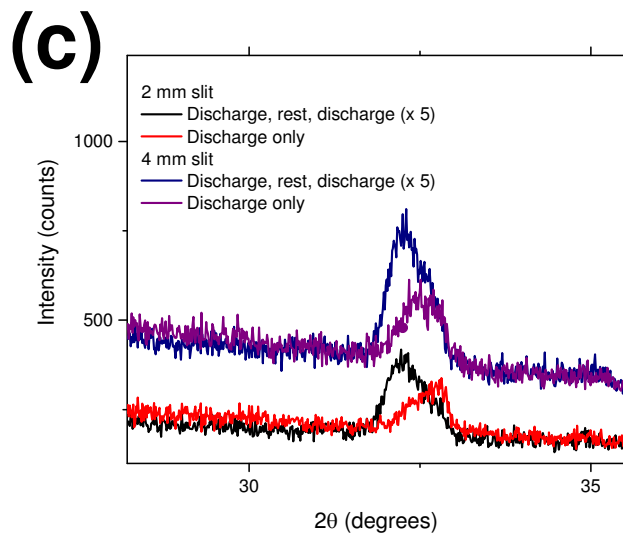

**Figure S3.** As collected XRD patterns from electrodes extracted from an *in situ* cell that was charged at 12 mA/g and discharged at 200 mA/g. Two sets of sequences are tested, the first is a discharge-rest-discharge and this is repeated 5 times while the second is a straight discharge followed by extraction. The difference between smaller and larger slits is shown in (a) for the first case with the 002 reflection ( $P6_3/mmc$  and  $Cmcm$ ) while (b) shows both the first and second case with the small and large slits and (c) shows the 004 reflection ( $P6_3/mmc$  and  $Cmcm$ ).

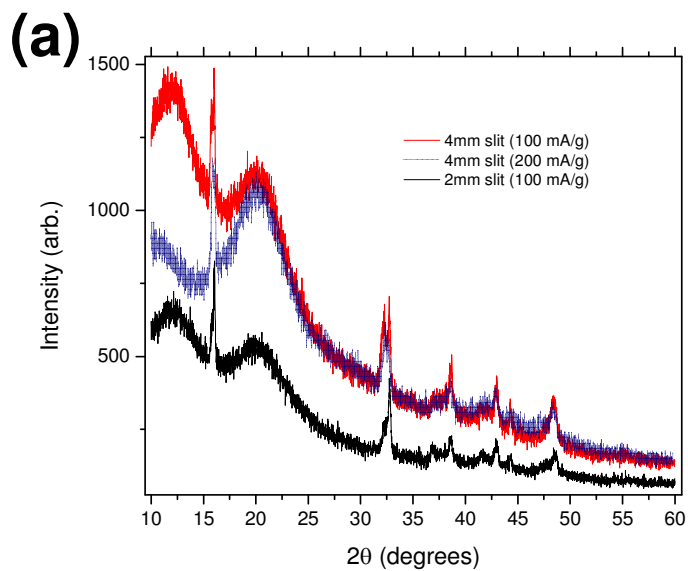

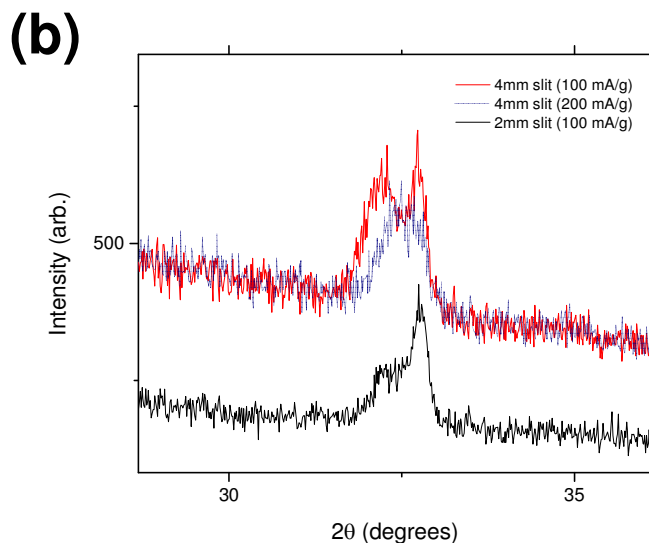

**Figure S4.** (a) As collected XRD patterns from electrodes extracted from an *in situ* cell that was charged at 12 mA/g and discharged at 100 mA/g (and 200 mA/g in grey – also shown in Figure S3). For the 100 mA/g case a straight discharge is applied followed by extraction. The difference between smaller (black) and larger (red) slits is shown in (b) for the 004 reflection ( $P6_3/mmc$  and  $Cmcm$ ) with a subtle preference for the  $P6_3/mmc$  phase with wider slits (i.e., the reflection at  $2\theta \sim 31.2$  compared to the reflection at  $2\theta \sim 31.8^\circ$ ).
